# Supplementary material
Source: PubMed Central journal article supplement (PMC3088162)

### Heart

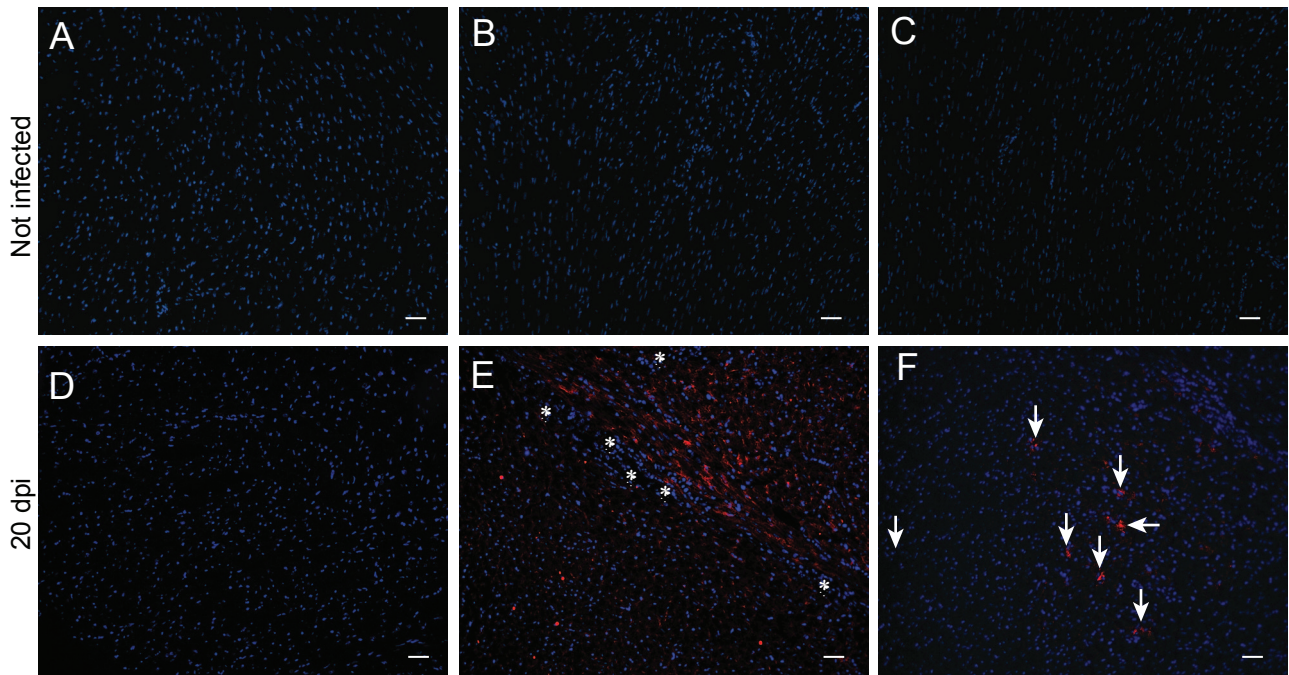

### Spleen

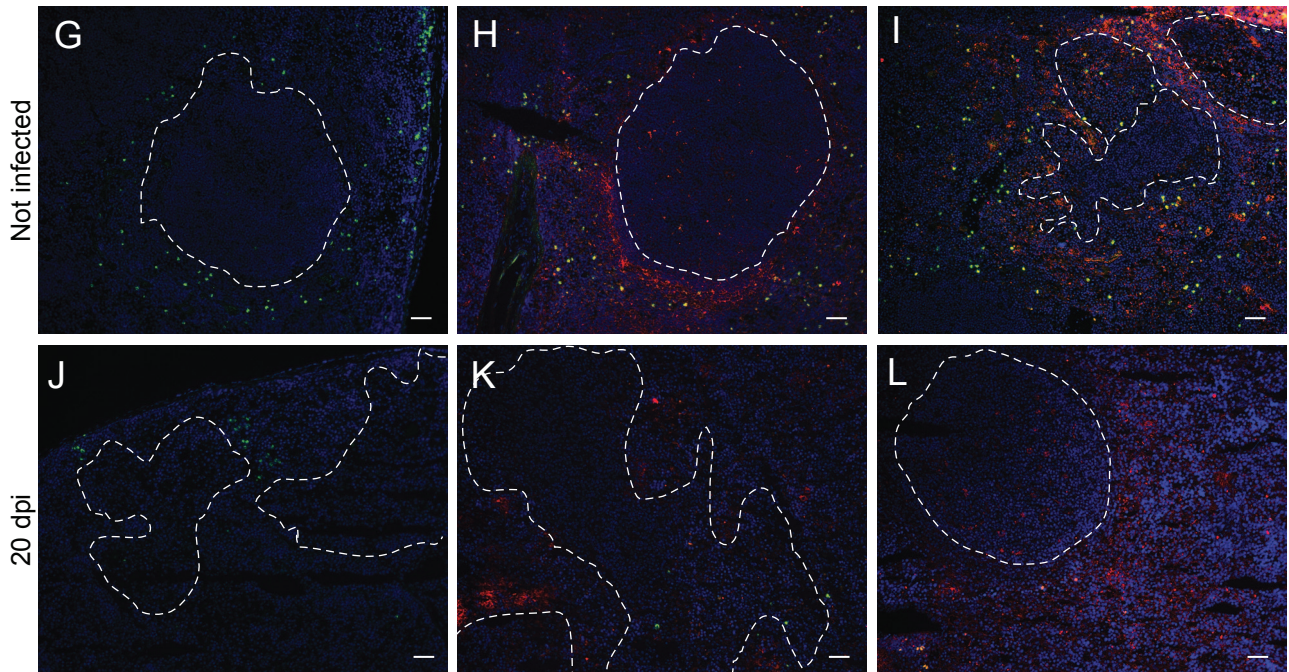

Supplement: supp_79_5_1873__1.pdf [file supp_79_5_1873__1.pdf]

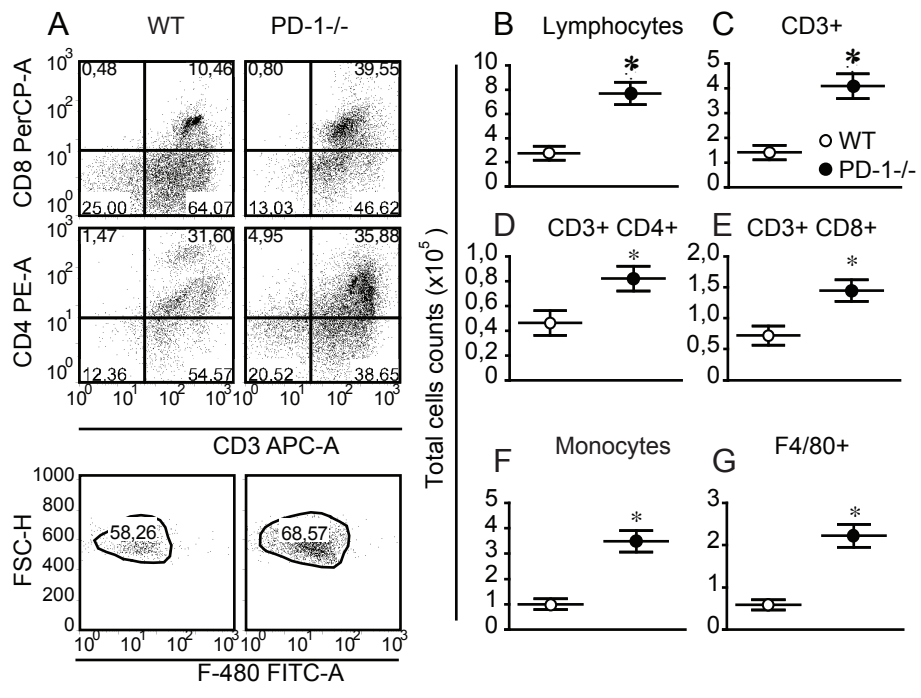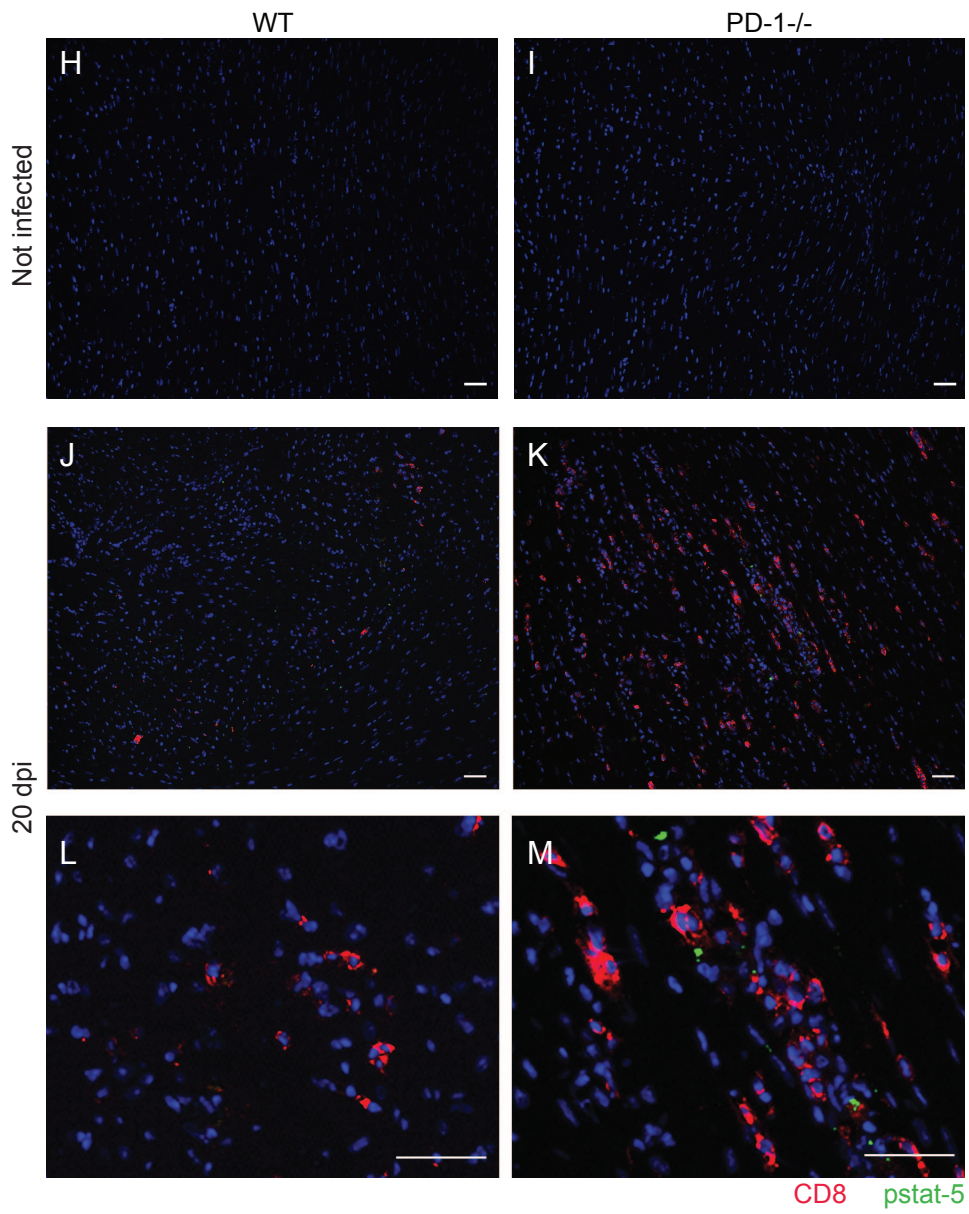

Supplement: supp_79_5_1873__2.pdf [file supp_79_5_1873__2.pdf]

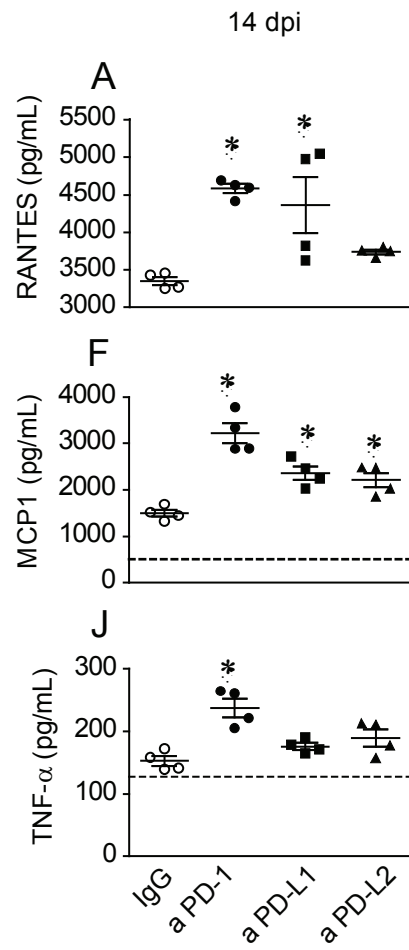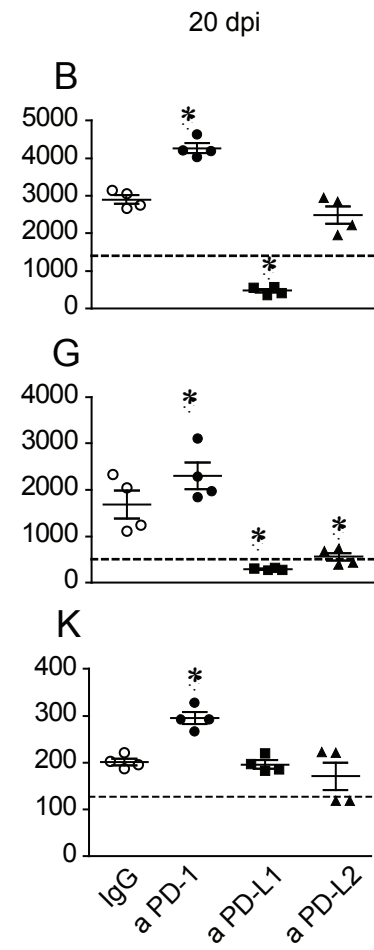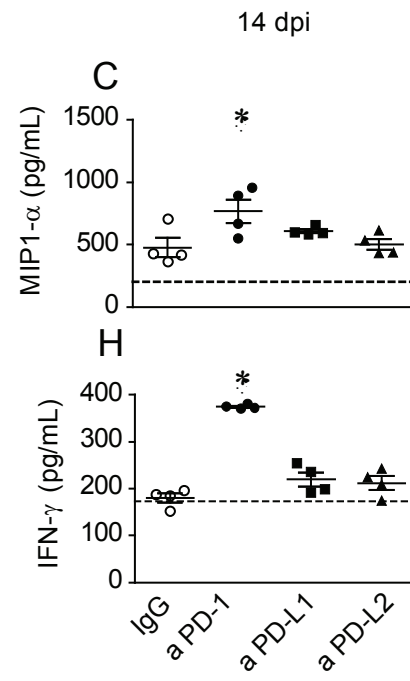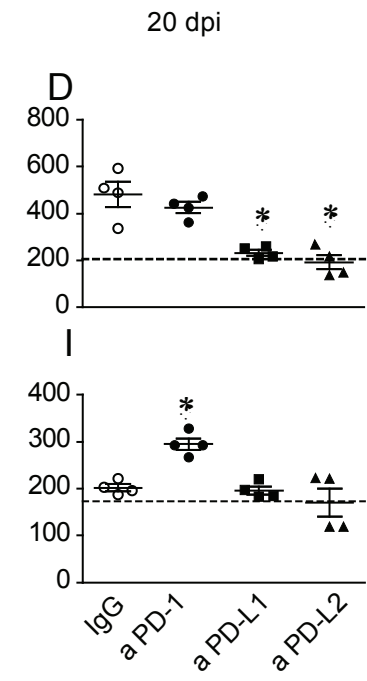

Supplement: supp_79_5_1873__3.pdf [file supp_79_5_1873__3.pdf]
